# Supplementary material for: Ultrafast self-powered CsPbCl3ultraviolet photodetectors with choline chloride for surface passivation and charge transport regulation
Source: Royal Society of Chemistry journal article supplement (doi:10.1039/d3tc00063j), 2023-01-01
Supplement: d3tc00063j1.pdf [file d3tc00063j1.pdf]

## **Ultrafast Self-powered CsPbCl<sub>3</sub> Ultraviolet Photodetectors with Choline Chloride for Surface Passivation and Charge Transport Regulation**

Shulan Jiang<sup>a</sup>, Zeliang Hou<sup>a</sup>, Xin Zheng<sup>b</sup>, Qian Wu<sup>a</sup>, Xiaoqi Yang<sup>a</sup>, Wuqiong Cai<sup>c</sup>, Ying Yi<sup>a</sup>, Siyi Cheng<sup>a</sup>, Guojun Wen<sup>a</sup>, Xingyue Liu<sup>a\*</sup>

<sup>a</sup> *School of Mechanical Engineering and Electronic Information, China University of Geosciences (Wuhan), Wuhan 430074, China*

<sup>b</sup> *Michael Grätzel Center for Mesoscopic Solar Cells, Wuhan National Laboratory for Optoelectronics, Huazhong University of Science and Technology, wuhan, Hubei, China*

<sup>c</sup> *Changsha Natural Resources Comprehensive Survey Center of China Geological Survey, Changsha, Hunan, China*

\* Address correspondence to (X. Liu) [liuxingyue@cug.edu.cn](mailto:liuxingyue@cug.edu.cn).

**Table S1** The binding energy analysis and atomic concentration of the elements of the non-modified and ChCl-modified CsPbCl<sub>3</sub> perovskite films.

| Orbital \ Sample     | CsPbCl <sub>3</sub><br>Binding energy (eV) | Atomic<br>concentration (%) | ChCl-modified CsPbCl <sub>3</sub><br>Binding energy (eV) | Atomic<br>concentration (%) |
|----------------------|--------------------------------------------|-----------------------------|----------------------------------------------------------|-----------------------------|
| Cs 3d <sub>5/2</sub> | 724.36                                     | 21.58%                      | 724.09                                                   | 19.70%                      |
| Cs 3d <sub>3/2</sub> | 738.32                                     |                             | 738.05                                                   |                             |
| Pb 4f <sub>7/2</sub> | 138.08                                     | 18.01%                      | 137.54                                                   | 16.98%                      |
| Pb 4f <sub>5/2</sub> | 142.93                                     |                             | 142.38                                                   |                             |
| Cl 2p <sub>3/2</sub> | 197.98                                     | 42.16%                      | 197.73                                                   | 41.73%                      |
| Cl 2p <sub>1/2</sub> | 199.58                                     |                             | 199.33                                                   |                             |

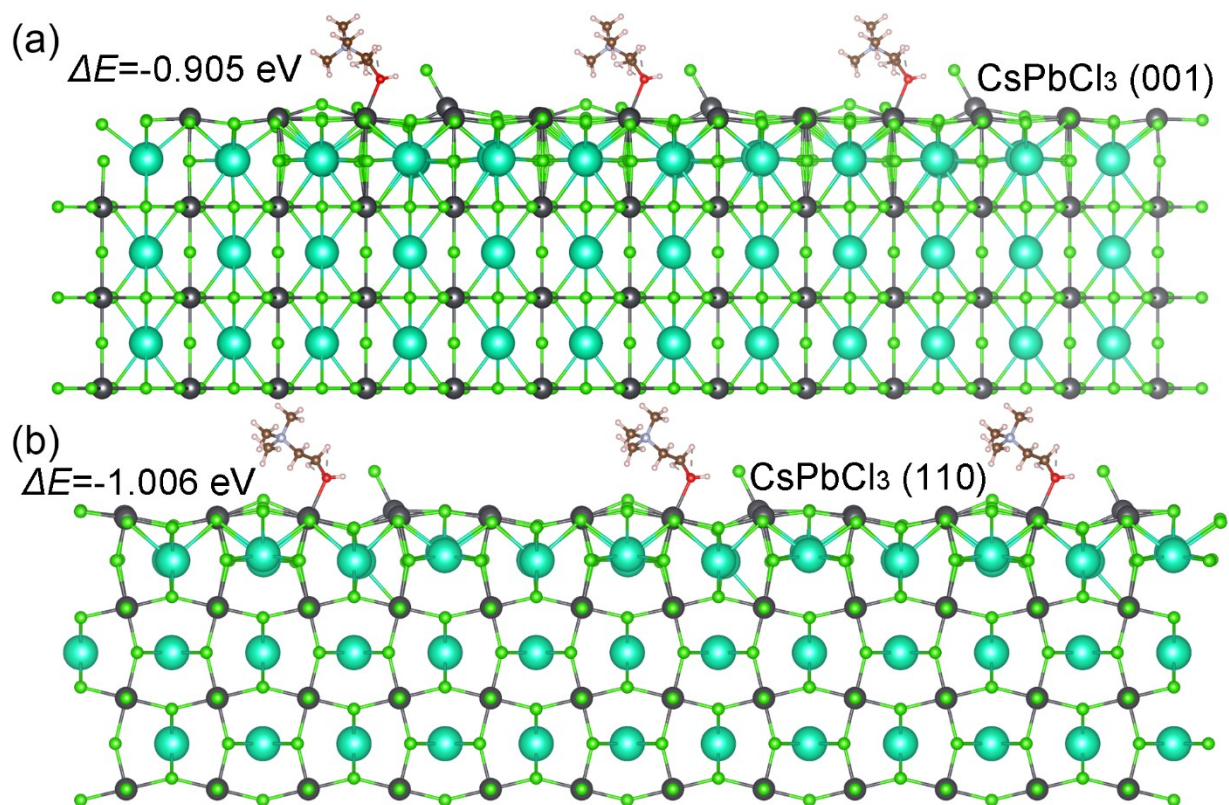

**Fig. S1** The as-calculated interfacial binding energy of the (a) CsPbCl<sub>3</sub> (001)/ChCl and (b) CsPbCl<sub>3</sub> (110)/ChCl interfaces.

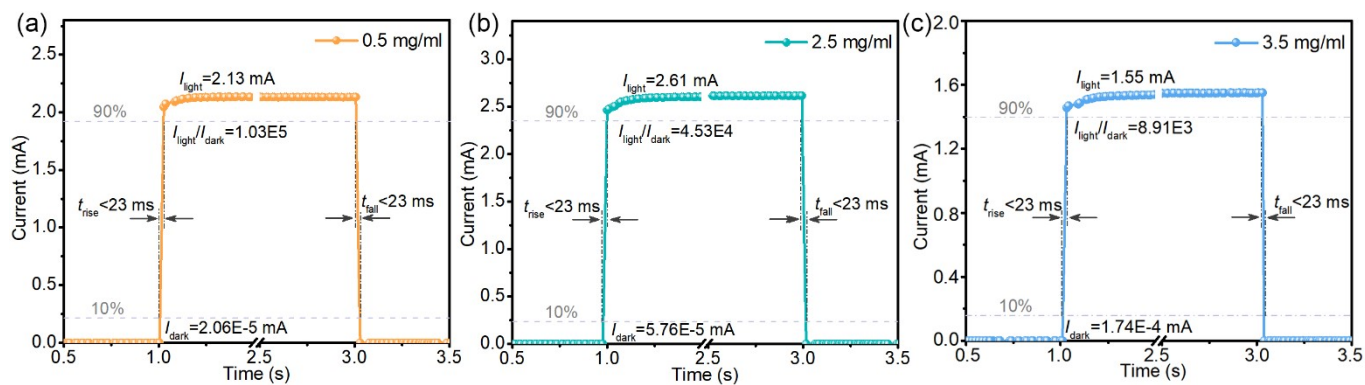

**Fig. S2** Detailed  $I_{ph}$ - $t$  curves of the photodetectors with (a) 0.5 mg/ml, (b) 2.5 mg/ml and (c) 3.5 mg/ml ChCl-modified  $CsPbCl_3$  films.
